# Supplementary material for: Green-emitting silicon nanoparticles as a fluorescent probe for highly-sensitive crocin detection and pH sensing
Source: Royal Society of Chemistry journal article supplement (doi:10.1039/d2nj00690a), 2022-01-01
Supplement: d2nj00690a1.pdf [file d2nj00690a1.pdf]

1 **Supporting Information for**  
2 **Green emitting silicon nanoparticles as a fluorescent probe for highly sensitive**  
3 **crocin detection and pH sensing**

4 Congjie Pan <sup>a,1,\*</sup>, Qiaoqiao Wen <sup>a,1</sup>, Longfei Ma <sup>b</sup>, Xuezhen Qin <sup>a</sup>, Suxiang Feng <sup>c,d,\*</sup>

5 *<sup>a</sup> School of Pharmacy, Henan University of Chinese Medicine, Zhengzhou, 450046,*  
6 *PR China*

7 *<sup>b</sup> Henan Police College, Zhengzhou, 450046, China*

8 *<sup>c</sup> Academy of Chinese Medical Sciences, Henan University of Chinese Medicine,*  
9 *Zhengzhou 450046, Henan, China*

10 *<sup>d</sup> Collaborative Innovation Center for Chinese Medicine and Respiratory Diseases co-*  
11 *constructed by Henan province & Education Ministry of P. R. China, Zhengzhou*  
12 *450046, Henan, China*

13

14 <sup>1</sup> C.J. Pan and Q.Q. Wen contributed equally to this work as first authors.

15 \*Corresponding author at: School of Pharmacy, Henan University of Chinese  
16 Medicine, Zhengzhou, 450046, China

17 *E-mail addresses:* pancongjie@hactcm.edu.cn (C.J. Pan); fengsx221@163.com (S.X.  
18 Feng).

## 19 Reagents and materials

20 N-[3-(trimethoxysilyl)propyl]-ethylenediamine (DAMO), crocin, 4,6-  
21 diaminoresorcinol dihydrochloride, gallic acid, protocatechuic acid (PA), geniposide,  
22 magnolol, naringin, ferulic acid, urea, glucose, maltose, crocetin, L-methionine (L-  
23 Met), L-cysteine (L-Cys), L-arginine (L-Arg), L-threonine (L-Thr) and L-isoleucine  
24 (L-Ile) were purchased from Aladdin Reagent Co., Ltd.  $\text{NaH}_2\text{PO}_4 \cdot 2\text{H}_2\text{O}$  and  
25  $\text{Na}_2\text{HPO}_4 \cdot 12\text{H}_2\text{O}$  were purchased in Tianjin Fuchen Chemical Reagent Factory.  
26 Phosphate buffered saline solution (PBS) was prepared with 100 mM  $\text{NaH}_2\text{PO}_4$ -  
27  $\text{Na}_2\text{HPO}_4$ . Cobalt chloride ( $\text{CoCl}_2$ ), sodium chloride ( $\text{NaCl}$ ), nickel chloride ( $\text{NiCl}_2$ ),  
28 silver nitrate ( $\text{AgNO}_3$ ), lead nitrate ( $\text{Pb}(\text{NO}_3)_2$ ), sodium perchlorate ( $\text{NaClO}_4$ ),  
29 potassium fluoride (KF), potassium oxalate ( $\text{K}_2\text{C}_2\text{O}_4 \cdot \text{H}_2\text{O}$ ) and potassium iodide (KI)  
30 were obtained from Tianjin Kemio Chemical Reagent Co., Ltd. Anhydrous aluminum  
31 chloride ( $\text{AlCl}_3$ ) was purchased from Tianjin FengChuan Chemical Reagent  
32 Technology Co., Ltd. Anhydrous ethanol was purchased from Zhengzhou Penny  
33 Chemical Reagent Co., Ltd. The reagents used in the high performance liquid  
34 chromatography (HPLC) experiment are chromatographic pure and purchased from  
35 Tianjin Siyou Chemical Co., Ltd. All other chemical reagents are analytical grade  
36 reagents, which can be directly used without further purification. Deionized water was  
37 used throughout the experiment.

### 38 **Apparatus and characterization**

39 The morphology and particle size of the SiNPs were characterized by JEOL  
40 JEM-2100F transmission electron microscopy (TEM). Fourier transform infrared  
41 spectroscopy (FT-IR) was recorded by a Bruker Tensor II spectrometer. X-ray  
42 photoelectron spectroscopy (XPS) was measured by an AXIS Supra photoelectron  
43 spectrometer. X-Ray Diffraction (XRD) pattern was obtained by D/max 82400 X-ray  
44 powder diffractometer (Rigaku, Japan) with Cu K $\alpha$  radiation ( $\lambda = 0.154056$  nm).  
45 Ultraviolet visible absorption spectrum (UV-Vis) was measured by ultraviolet visible  
46 spectrophotometer (Thermo evolution 260 bio). Time-dependent single photon  
47 counting was performed by FLS1000 steady-state/transient spectrometer (TCSPC)  
48 system was used to measure the fluorescence lifetime and quantum yield. Malvern  
49 Zetasizer Nano ZS90 nano particle size and Zeta potential analyzer were used to  
50 perform the measurements of zeta potential of the synthesized SiNPs. Fluorescence  
51 measurements were carried out using an F-7000 spectrofluorophotometer with both  
52 excitation and emission slits set at 5 nm, the excitation wavelength was 437 nm and  
53 emission wavelength was 513 nm. HPLC analysis was performed on a Thermo  
54 Scientific U-3000 chromatographic system.

### 55 **Calculation of p*K*<sub>a</sub> value of the SiNPs**

56 The SiNPs are assumed to be monoacid. The SiNPs are all in the forms of  
57 molecule (HB) and ion (B<sup>-</sup>) under high acidity and alkaline conditions, respectively.  
58 Firstly, a series of SiNPs solutions with different pH values (3.5, 4, 4.5, 5, 5.5, 6, 6.5,  
59 7, 7.5, 8, 8.5, 9, 9.5, 10) were prepared. Then, the FL intensity of the above solutions

60 was detected. A linear relationship between  $lg \frac{I_{HB}^0 - I}{I - I_{B^-}^0}$  and pH was observed.

$$61 \quad pK_a = -lg \frac{I_{HB}^0 - I}{I - I_{B^-}^0} + pH$$

62  $I_{HB}^0$  represents the FL intensity of the SiNPs under high acidity conditions.  $I_{B^-}^0$   
63 represents the FL intensity of the SiNPs under high alkaline conditions.  $I$  represents  
64 the FL intensity of SiNPs under different pH conditions.

### 65 HPLC detection of gardenia yellow pigment

66 To validate the accuracy of the SiNPs-based fluorescence method for gardenia  
67 yellow pigment detection in traditional Chinese herb samples, HPLC analysis was  
68 performed. The separation was performed on a Venusil XBP-C<sub>18</sub> column (4.6×250  
69 mm, 5 μm). The conditions for detection of crocin by HPLC was as follows: mobile  
70 phase: acetonitrile (A) and water (B), elution mode: gradient elution (0~10 min: 22 ~  
71 30 A), flow rate: 1.0 mL/min, column temperature: 30 °C, detection wavelength: 440  
72 nm, injection volume: 5 μL. A series of crocin standard solutions of 0.03 mg/mL, 0.06  
73 mg/mL, 0.120 mg/mL, 0.240 mg/mL and 0.480 mg/mL were prepared. The working  
74 curve was drawn with the concentration of crocin and chromatographic peak area.  
75 The gardenia yellow pigment content of three traditional Chinese herb samples was  
76 detected under the above detection conditions. And recovery experiments were also  
77 performed to further validate the accuracy of the HPLC method.

### 78 Preparation of fluorescent paper sensor

79 In order to detect crocin more conveniently, a paper sensor based on the SiNPs  
80 was established. The fabrication process of the paper sensor was as follows: Firstly,

81 the qualitative filter paper was immersed into SiNPs solution for 20 min, then it was  
82 taken out and dried in an oven at 50 °C. After cooling to room temperature, the  
83 qualitative filter paper was cut into strips as fluorescent paper sensor. 10 µL of  
84 different concentrations of crocin solution was added to the obtained filter paper strips.  
85 After the solvent was naturally evaporated at room temperature, the filter paper strips  
86 were observed under sunlight and 365 nm ultraviolet lamp.

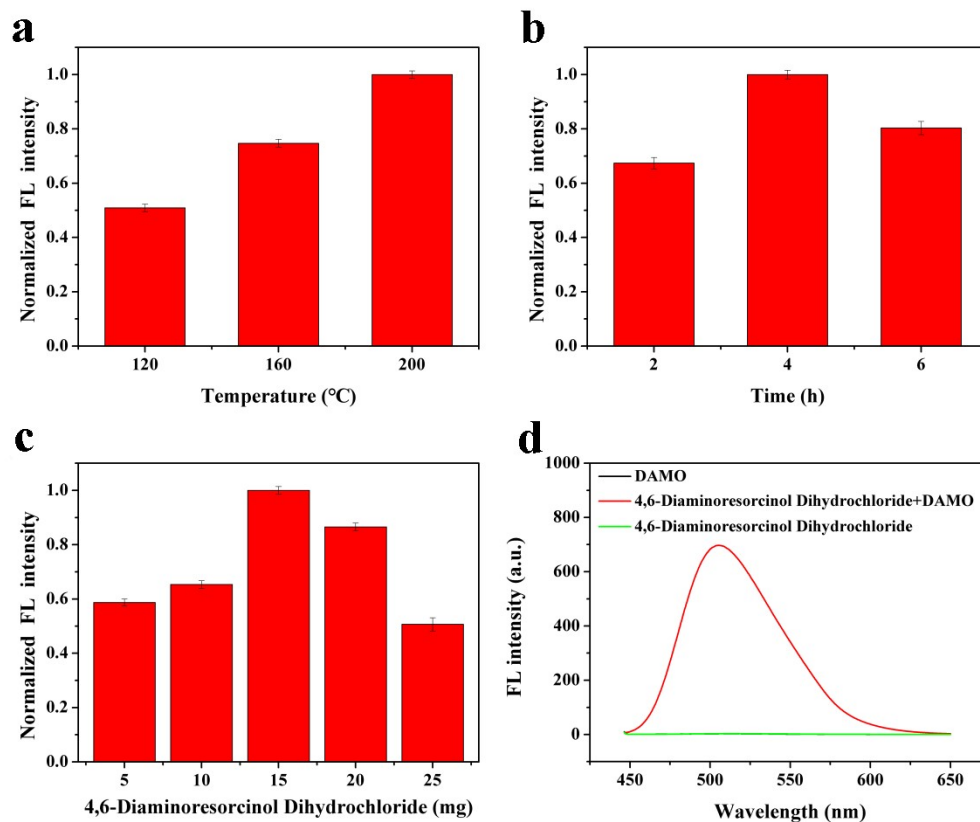

87

88 **Fig. S1** Normalized FL intensity of the SiNPs synthesized at different reaction  
 89 temperature (a), different reaction time (b) and different dosage of reducing agent (c).  
 90 The fluorescence emission spectra of the materials prepared by the reaction of only  
 91 DAMO, only 4,6-diaminoresorcinol dihydrochloride, DAMO+ 4,6-diaminoresorcinol  
 92 dihydrochloride under the same conditions (d).

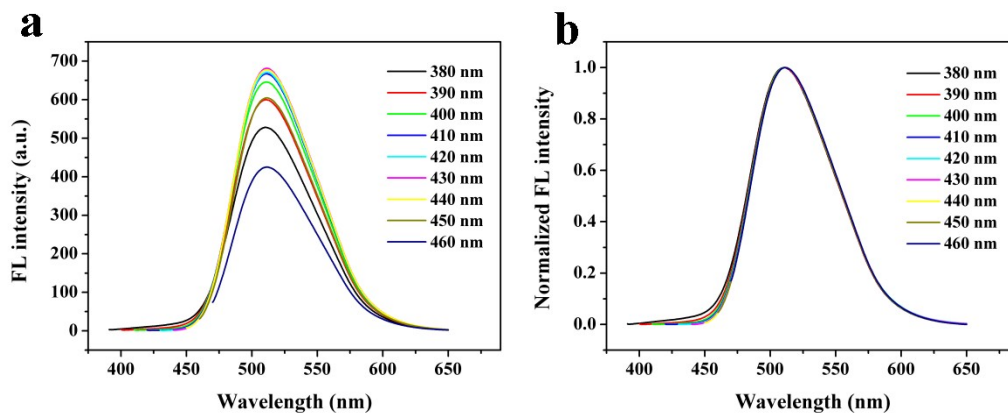

93

94 **Fig. S2** FL intensity (a), and normalized FL intensity (b) of the prepared SiNPs at

95 different excitation wavelengths.

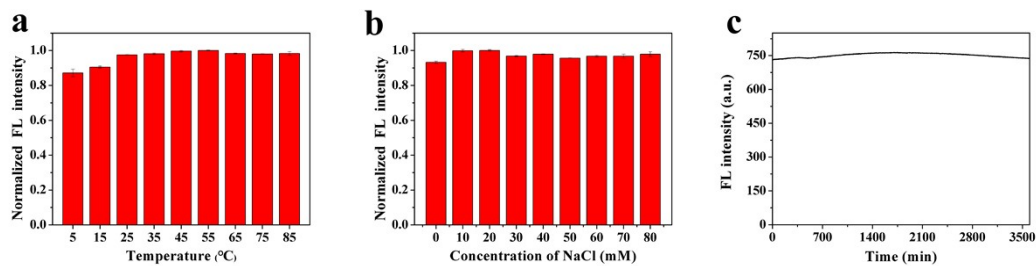

96

97 **Fig. S3** (a) Normalized FL intensity of the SiNPs after incubation at different  
 98 temperatures for 10 min; (b) Normalized FL intensity of the SiNPs in NaCl solution  
 99 of different concentrations; (c) The FL intensity variation tendency of the SiNPs as a  
 100 function of time under 437 nm light illumination. The error bar is the standard  
 101 deviation of three independent experiments.



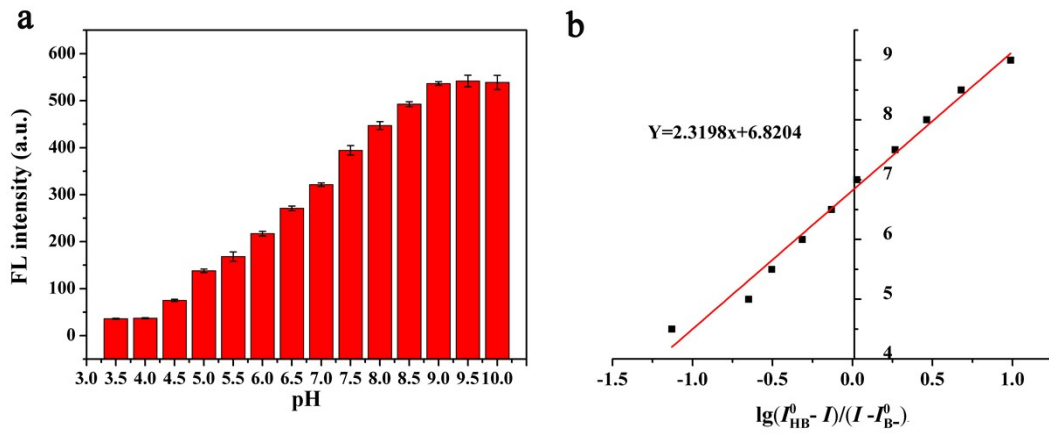

102

103 **Fig. S4** (a) FL intensity of the SiNPs incubated in 100 mM PBS with different pH

104 values. (b)  $\lg \frac{I_{HB}^0 - I}{I - I_{B^-}^0}$  as a function of the pH.

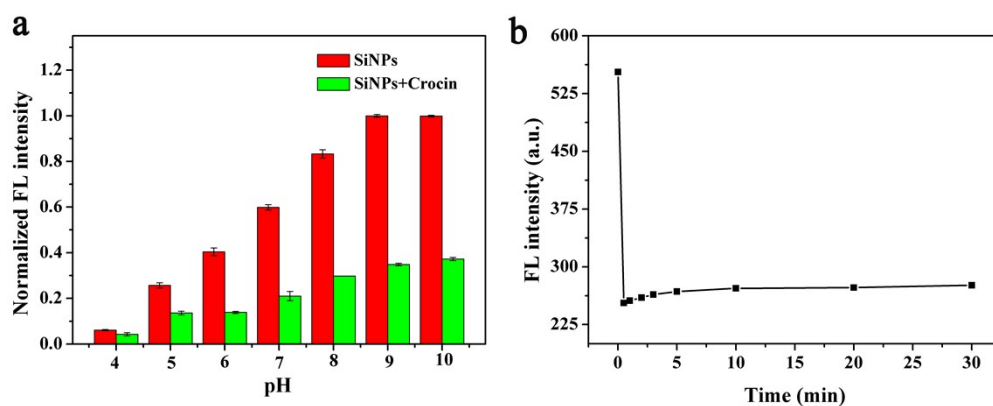

105

106 **Fig. S5** (a) Normalized FL intensity of the SiNPs (red bars) and the subsequent  
 107 addition of 10  $\mu\text{M}$  crocin (green bars) at different pH values. (b) Time-dependent FL  
 108 intensity of the SiNPs with the addition of crocin (10  $\mu\text{M}$ ) at room temperature.

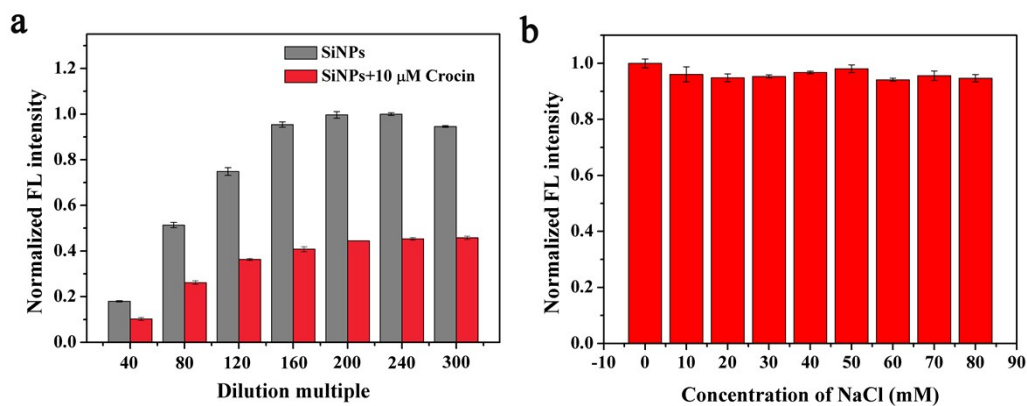

109

110 **Fig. S6** (a) Normalized FL intensity of the SiNPs with different dilution multiple  
 111 (gray bars) and the subsequent addition of 10 μM crocin (red bars). (b) Normalized  
 112 FL intensity of the mixture of SiNPs and 10 μM crocin in the presence of different  
 113 concentrations of NaCl.

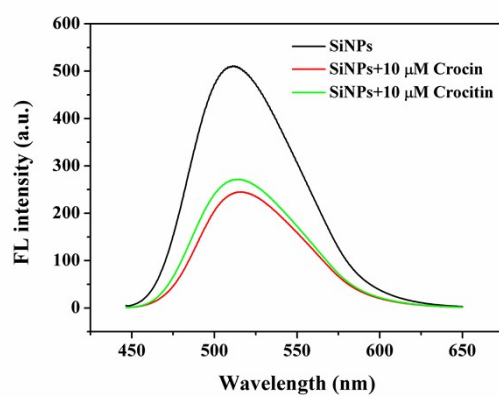

114

115 **Fig. S7** Fluorescence responses of the SiNPs upon addition of 10 μM crocin and  
116 crocetin in a 100 mM pH 9.0 PBS solution, respectively.

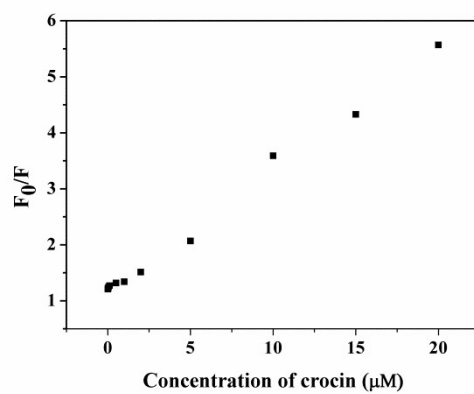

117

118 **Fig. S8**  $F_0/F$  of the SiNPs as a function of the concentration of crocin.

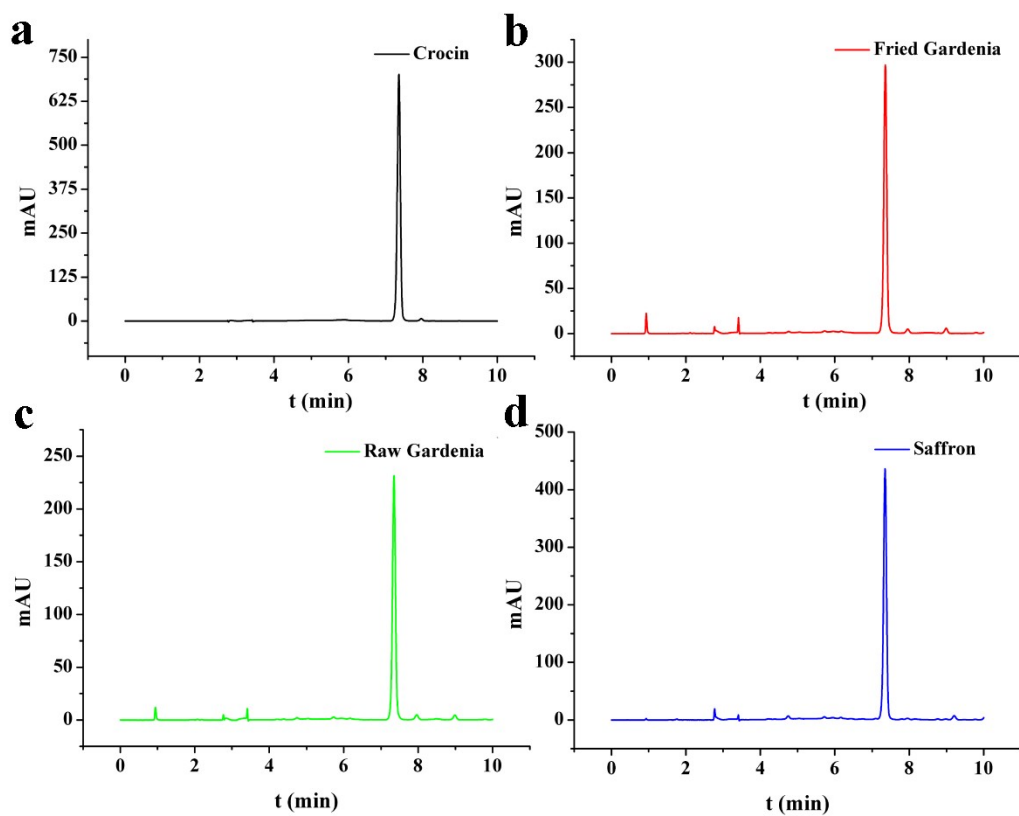

120

121 **Fig. S9** HPLC chromatograms of crocin standard (a), raw gardenia  
 122 (c), and saffron (d); Detection conditions: mobile phase: acetonitrile (A) and water (B),  
 123 elution mode: gradient elution (0 ~ 10 min: 22 ~ 30 A), flow rate: 1.0 mL/min,  
 124 column temperature: 30 °C, detection wavelength: 440 nm).

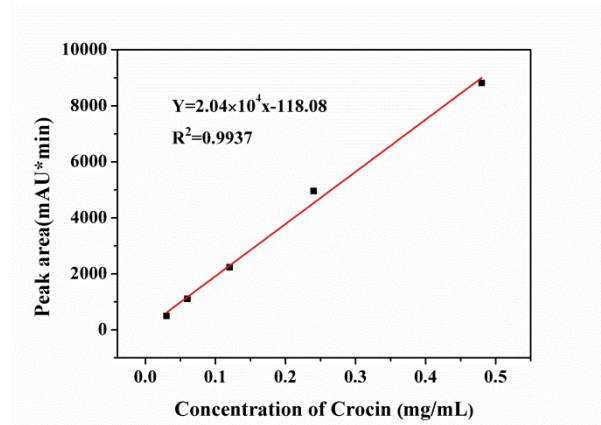

125

126 **Fig. S10** The linear relationship between peak area and crocin concentration in HPLC  
127 method.

128 **Table S1** Comparison of methods for crocin detection.

| Applied material | Method            | Linear range                  | LOD                      | Ref.      |
|------------------|-------------------|-------------------------------|--------------------------|-----------|
| -                | RP-HPLC           | 0.86-27.54 mg·L <sup>-1</sup> | 0.42 mg·L <sup>-1</sup>  | 6         |
| -                | HPLC- ESI-MS/MS   | 50-1000 ng/mL                 | 0.02 µg/g                | 8         |
| -                | MEKC              | 5-100 µg·g <sup>-1</sup>      | 0.2 µg·g <sup>-1</sup>   | 9         |
| Au               | Electrochemical   | 0.99-9.09 µM                  | -                        | 10        |
| -                | DLLME- UV-Vis     | 0.01-150 ng/mL                | 0.008 ng/mL              | 11        |
| -                | DLLME-SFO- UV-Vis | 0.01-150 ng/mL                | 0.005 ng/mL              | 11        |
| -                | UV-Vis            | 5-100 mg·mL <sup>-1</sup>     | 1.36 mg·mL <sup>-1</sup> | 12        |
| SiNPs            | Fluorescence      | 0.01-17 µM                    | 3.3 nM                   | This work |

129



130 **Table S2** Influence of different crocin concentrations on fluorescence lifetime of  
131 SiNPs.

| Concentration of crocin ( $\mu\text{M}$ ) | Fluorescence lifetime (ns) |
|-------------------------------------------|----------------------------|
| 0                                         | 3.24                       |
| 5                                         | 3.08                       |
| 10                                        | 3.08                       |
| 15                                        | 3.02                       |

132

133 **Table S3** Determination of gardenia yellow pigment in raw gardenia, fried gardenia  
 134 and saffron by HPLC.

| Sample         | Original concentration (mg/mL) | Spiked concentration (mg/mL) | Measured concentration ( mg/mL ) | Recovery (%) | Average Recovery (%) | RSD (%<br>n=3) |
|----------------|--------------------------------|------------------------------|----------------------------------|--------------|----------------------|----------------|
| Raw gardenia   | 0.066<br>(6.572 mg/g)          | 0.04600                      | 0.11007                          | 96.64        | 100.27               | 1.91           |
|                |                                | 0.04600                      | 0.11169                          | 100.17       |                      |                |
|                |                                | 0.04600                      | 0.11195                          | 100.73       |                      |                |
|                |                                | 0.04600                      | 0.11257                          | 102.08       |                      |                |
|                |                                | 0.04600                      | 0.11232                          | 101.54       |                      |                |
|                |                                | 0.04600                      | 0.11184                          | 100.48       |                      |                |
| Fried gardenia | 0.084<br>(8.371 mg/g)          | 0.08700                      | 0.17017                          | 99.96        | 100.13               | 0.19           |
|                |                                | 0.08700                      | 0.17048                          | 100.31       |                      |                |
|                |                                | 0.08700                      | 0.17052                          | 100.36       |                      |                |
|                |                                | 0.08700                      | 0.17019                          | 99.98        |                      |                |
|                |                                | 0.08700                      | 0.17040                          | 100.22       |                      |                |
|                |                                | 0.08700                      | 0.17016                          | 99.94        |                      |                |
| Saffron        | 0.123<br>(122.764 mg/g)        | 0.11100                      | 0.23408                          | 100.38       | 100.06               | 0.26           |
|                |                                | 0.11100                      | 0.23407                          | 100.37       |                      |                |
|                |                                | 0.11100                      | 0.23365                          | 99.99        |                      |                |
|                |                                | 0.11100                      | 0.23364                          | 99.98        |                      |                |
|                |                                | 0.11100                      | 0.23334                          | 99.70        |                      |                |
|                |                                | 0.11100                      | 0.23361                          | 99.99        |                      |                |

135

136 **Table S4** Determination of gardenia yellow pigment in raw gardenia, fried gardenia  
137 and saffron with different methods.

|           | Raw gardenia (mg/g) | Fried gardenia (mg/g) | Saffron (mg/g) |
|-----------|---------------------|-----------------------|----------------|
| This work | 6.534±0.226         | 8.420±0.295           | 122.727±1.018  |
| HPLC      | 6.572±0.002         | 8.371±0.004           | 122.764±0.005  |

138
